# Supplementary material
Source: Springer Nature journal article supplement (https://www.springermedizin.de/resource/supplementary/12935_2009_235_MOESM3_ESM.pdf/9540190)

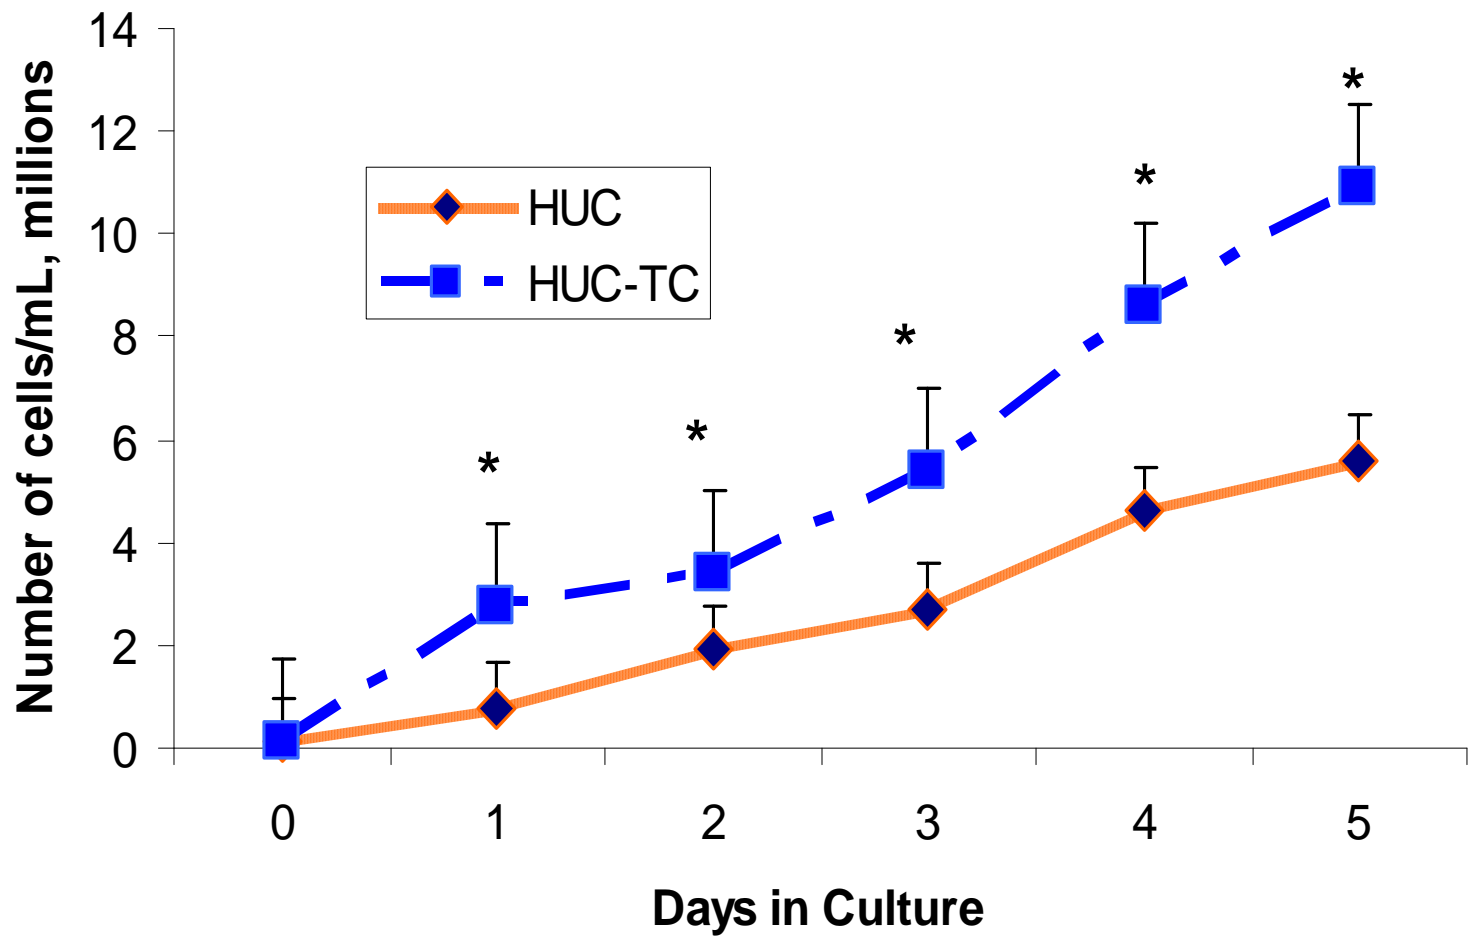

Supplement: MOESM3 [file 9540190]
